# Supplementary material for: Ammonia Sensing Performance of Polyaniline-Coated Polyamide 6 Nanofibers
Source: PubMed Central journal article supplement — ACS Omega. 2021 Mar 22;6(13):8950–7. doi: 10.1021/acsomega.0c06272 (PMC8028015; doi:10.1021/acsomega.0c06272), 2021-03-22
Supplement: ao0c06272_si_001.pdf [file ao0c06272_si_001.pdf]

# Supporting Information

## Ammonia sensing performance of polyaniline coated polyamide-6 nanofibers

Zengyuan Pang,<sup>a</sup> Erol Yildirim,<sup>b</sup> Melissa A. Pasquinelli\*<sup>c</sup> and Qufu Wei\*<sup>a,d</sup>

a. Key Laboratory of Eco-Textiles, Ministry of Education, Jiangnan University, Wuxi 214122, Jiangsu, China.

b. Department of Chemistry, Middle East Technical University, 06800 Ankara, Turkey.

c. College of Natural Resources, North Carolina State University, 2820 Faucette Drive, Raleigh, North Carolina 27695, United States.

d. Minjiang University, Fuzhou 350108, Fujian, China

E-mail of corresponding authors: melissa\_pasquinelli@ncsu.edu; qfwei@jiangnan.edu.cn

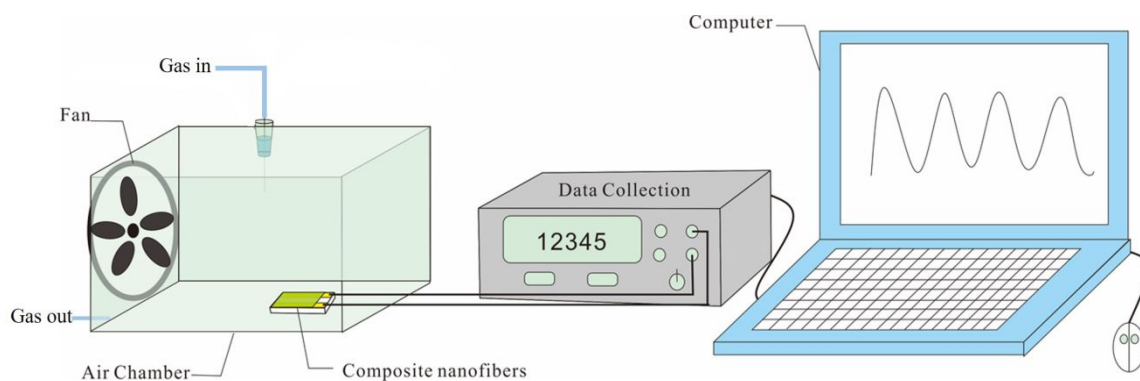

Figure S1. Schematic illustration of the home-made gas sensing test system

Table S1. Response time to ammonia in this work and those reported in the literatures

| Device                                                      | Ammonia concentration / ppm | Response time / s | Working temperature | Reference |
|-------------------------------------------------------------|-----------------------------|-------------------|---------------------|-----------|
| PANI film deposited on PET substrate                        | 200                         | 191               | RT                  | 1         |
| Carbon nanotubes and HCSA doped-polyaniline composite films | 1000                        | 167±12            | RT                  | 2         |
| p-type 0.75 wt% rGO-SnO <sub>2</sub>                        | 50                          | 60                | RT                  | 3         |
| MoS <sub>2</sub> /graphene                                  | 100                         | 300               | 100 °C              | 4         |
| Pt/GaOx/GaN                                                 | 200                         | ~150              | 523 K               | 5         |
| PA6/PANI composite nanofibers                               | 100                         | 28                | RT                  | this work |
|                                                             | 200                         | 27                |                     |           |
|                                                             | 50                          | 40                |                     |           |

RT stands for room temperature

#### References

1. Kumar, L.; Rawal, I.; Kaur, A.; Annapoorni, S. Flexible room temperature ammonia sensor based on polyaniline. *Sensor. Actuat. B-Chem.* **2017**, *240*, 408-416.
2. Eising, M.; Cavab, C. E.; Salvatierra, R. V.; Zarbin, A. J. G.; Roman, L. S. Doping effect on self-assembled films of polyaniline and carbonnanotube applied as ammonia gas sensor. *Sensor. Actuat. B-Chem.* **2017**, *245*, 25-33.
3. Feng, Q. X.; Li, X. G.; Wang, J. Percolation effect of reduced graphene oxide (rGO) on ammonia sensing of rGO-SnO<sub>2</sub> composite based sensor. *Sensor. Actuat. B-Chem.* **2017**, *243*, 1115-1126.
4. Cho, B.; Yoon, J.; Lim, S. K.; Kim, A. R.; Kim, D. H.; Park, S. G.; Kwon, J. D.; Lee, Y. J.; Lee, K. H.; Lee, B. H.; Ko, H. C.; Hahm, M. G. Chemical sensing of 2D gaphene/MoS<sub>2</sub> heterostructure device. *ACS Appl. Mater. Inter.* **2015**, *77*, 16775-16780.
5. Liu, I. P.; Chang, C. H.; Ke, B. Y.; Lin, K. W. Ammonia sensing performance of a GaN-based Schottky diode incorporating a platinum thin film and a GaOx dielectric. *IEEE Sens. J.* **2019**, *19*, 10207-10213.
